# Supplementary material for: Threshold Atmospheric Electric Fields for Initiating Relativistic Runaway Electron Avalanches: Theoretical Estimates and CORSIKA Simulations
Source: Copernicus journal article supplement (doi:10.5194/egusphere-2025-4153), 2025-10-05
Supplement: Supplementary file [file Response_to_Reviewer.pdf › Response_to_Reviewer.pdf]

## Response to Reviewer Comments

Manuscript: **Threshold Atmospheric Electric Fields for Initiating Relativistic Runaway Electron Avalanches.**

Authors: Ashot Chilingarian, Liza Hovhannisyan, Mary Zazyan

### Introduction and Terminology

| ID             | Reviewer Comment                                                                                                  | Location     | Revised Text (Changes in Red)                                                                                                                                                                                                                                              |
|----------------|-------------------------------------------------------------------------------------------------------------------|--------------|----------------------------------------------------------------------------------------------------------------------------------------------------------------------------------------------------------------------------------------------------------------------------|
| <b>Intro-1</b> | “Stronger than what? What is the reference value?”                                                                | p.3, line 66 | Additionally, secondary electrons produced by Møller scattering are not generated along the field line; therefore, Atmospheric Electric Fields (AEFs) 10–20% stronger than the theoretical RREA threshold are required for electrons to run away and trigger an avalanche. |
| <b>Intro-2</b> | “development by calculating the number of electrons and gamma rays at various stages within the AEF every 200 m.” | p.3, line 89 | The CORSIKA code models the development of RREA by calculating the number of electrons and gamma rays at different stages of the atmospheric electric field at 200-meter intervals.                                                                                        |
| <b>Term-1</b>  | “Be consistent with spelling.”                                                                                    | p.3          | All station names and abbreviations were made consistent throughout the manuscript (e.g., Lomnický Štít, LHAASO).                                                                                                                                                          |
| <b>Term-2</b>  | “Is this the previous acronym or a city?” (referring to “RRE avalanches”)                                         | p.3          | The incorrect phrase “RRE avalanches” was replaced with the correct standard term “RREA” throughout the manuscript.                                                                                                                                                        |

### Figures

| ID           | Reviewer Comment                                     | Location | Revised Text (Changes in Red)                                                                                                 |
|--------------|------------------------------------------------------|----------|-------------------------------------------------------------------------------------------------------------------------------|
| <b>Fig-1</b> | “Unless you have something extra to add, you can say | p.5      | Figure captions for Figures 2–4 were shortened to avoid unnecessary repetition, while keeping station-specific details (e.g., |

| <b>ID</b> | <b>Reviewer Comment</b>                               | <b>Location</b> | <b>Revised Text (Changes in Red)</b> |
|-----------|-------------------------------------------------------|-----------------|--------------------------------------|
|           | ‘Same as Fig. 1 but for the Lomnický Stit station’... |                 | starting altitude, station name).    |

### **Language and Style**

| <b>ID</b>     | <b>Reviewer Comment</b> | <b>Location</b> | <b>Revised Text (Changes in Red)</b>                 |
|---------------|-------------------------|-----------------|------------------------------------------------------|
| <b>Lang-1</b> | “were” (grammar error)  | p.3, line 113   | The grammar error (“were”) was corrected to (“was”). |

### **Summary**

All reviewer comments have been addressed in the revised version of the manuscript. The text, figures, and references have been corrected or expanded where necessary to improve clarity and scientific precision.
